# Supplementary material for: Terbium(iii)-based coordination polymer with millimeter-size single crystals and high selectivity and sensitivity for folic acid
Source: Royal Society of Chemistry journal article supplement (doi:10.1039/d2ce01608g), 2023-01-01
Supplement: d2ce01608g1.pdf [file d2ce01608g1.pdf]

Supplementary Information for

# Terbium(III)-based coordination polymer with millimeter single-crystal size, high selectivity and sensitivity for folic acid

*Xiaoyang Zhao<sup>a</sup>, Jianfeng Wu<sup>a\*</sup>, Wei Tian<sup>a\*</sup>*

<sup>a</sup>School of Chemistry and Chemical Engineering, Northwestern Polytechnical University, Xi'an, 710072, China

E-mail address: happytw\_3000@nwpu.edu.cn

**Table S1** Crystal data and structure refinement parameters for the complex

| <b>Complex</b>    | <b>[Tb(Hpda)(pda)(H<sub>2</sub>O)<sub>2</sub>]·4H<sub>2</sub>O</b> |
|-------------------|--------------------------------------------------------------------|
| Empirical formula | C <sub>14</sub> H <sub>19</sub> N <sub>2</sub> O <sub>14</sub> Tb  |
| Crystal system    | Monoclinic                                                         |
| Formula weight    | 598.23                                                             |
| Temperature (K)   | 273.15                                                             |
| Space group       | <i>P</i> 2 <sub>1</sub> / <i>c</i>                                 |
| a (Å)             | 14.0209(8)                                                         |
| b (Å)             | 11.2186(7)                                                         |
| c (Å)             | 12.8497(7)                                                         |
| α (°)             | 90                                                                 |
| β (°)             | 102.327(2)                                                         |

|                                            |                                                   |
|--------------------------------------------|---------------------------------------------------|
| $\gamma$ (°)                               | 90                                                |
| Volume (Å <sup>3</sup> )                   | 1974.6(2)                                         |
| Z                                          | 4                                                 |
| $\rho_{\text{calc}}$ (mg/cm <sup>3</sup> ) | 2.012                                             |
| $\mu$ (mm <sup>-1</sup> )                  | 3.660                                             |
| F(000)                                     | 1176.0                                            |
| $\theta$ range for collection (°)          | 2.974 to 30.594                                   |
| Index ranges                               | -17 ≤ h ≤ 20, -14 ≤ k ≤ 16, -18 ≤ l ≤ 18          |
| Reflections collected/unique               | 33196 / 5681 [R(int) = 0.0211]                    |
| Data/restraints/parameters                 | 5681/2/299                                        |
| Goodness-of-fit on F <sup>2</sup>          | 1.117                                             |
| Final R indices [I > 2σ(I)]                | R <sub>1</sub> = 0.0211, wR <sub>2</sub> = 0.0551 |
| R indices (all data)                       | R <sub>1</sub> = 0.0244, wR <sub>2</sub> = 0.0562 |

**Table S2** Selected bond lengths (Å) and angles (°) of the complex

| <b>[Tb(Hpda)(pda)(H<sub>2</sub>O)<sub>2</sub>]·4H<sub>2</sub>O</b> |            |                     |            |
|--------------------------------------------------------------------|------------|---------------------|------------|
| Tb(1)-O(6)#1                                                       | 2.5149(16) | Tb(1)-O(8)#1        | 2.4704(17) |
| Tb(1)-O(1)                                                         | 2.5194(18) | Tb(1)-O(4)          | 2.4397(18) |
| Tb(1)-O(5)                                                         | 2.4494(16) | Tb(1)-N(2)#1        | 2.5729(18) |
| Tb(1)-O(10)                                                        | 2.4041(18) | Tb(1)-N(1)          | 2.572(2)   |
| Tb(1)-O(9)                                                         | 2.4460(17) |                     |            |
| O(6)#1-Tb(1)-O(1)                                                  | 83.81(6)   | O(6)#1-Tb(1)-N(2)#1 | 62.12(5)   |
| O(6)#1-Tb(1)-N(1)                                                  | 71.90(6)   | O(1)-Tb(1)-N(2)#1   | 65.40(6)   |
| O(1)-Tb(1)-N(1)                                                    | 62.25(6)   | O(5)-Tb(1)-O(6)#1   | 136.85(6)  |

|                     |           |                    |           |
|---------------------|-----------|--------------------|-----------|
| O(5)-Tb(1)-O(1)     | 139.17(6) | O(5)-Tb(1)-O(8)#1  | 77.31(6)  |
| O(5)-Tb(1)-N(2)#1   | 129.30(6) | O(5)-Tb(1)-N(1)    | 118.66(6) |
| O(10)-Tb(1)-O(6)#1  | 73.10(6)  | O(10)-Tb(1)-O(1)   | 140.40(6) |
| O(10)-Tb(1)-O(5)    | 71.85(6)  | O(10)-Tb(1)-O(8)#1 | 85.78(7)  |
| O(10)-Tb(1)-O(4)    | 80.12(7)  | O(10)-Tb(1)-N(2)#1 | 75.36(6)  |
| O(10)-Tb(1)-N(1)    | 134.06(7) | O(10)-Tb(1)-O(9)   | 141.37(6) |
| O(8)#1-Tb(1)-O(6)#1 | 124.07(5) | O(8)#1-Tb(1)-O(1)  | 81.06(6)  |
| O(8)#1-Tb(1)-N(2)#1 | 62.59(6)  | O(8)#1-Tb(1)-N(1)  | 139.06(7) |
| O(4)-Tb(1)-O(6)#1   | 75.34(6)  | O(4)-Tb(1)-O(1)    | 124.96(6) |
| O(4)-Tb(1)-O(5)     | 74.58(6)  | O(4)-Tb(1)-O(8)#1  | 151.29(6) |
| O(4)-Tb(1)-N(2)#1   | 135.34(6) | O(4)-Tb(1)-N(1)    | 62.93(6)  |
| N(1)-Tb(1)-N(2)#1   | 111.98(6) | O(9)-Tb(1)-O(6)#1  | 144.00(6) |
| O(9)-Tb(1)-O(1)     | 71.60(7)  | O(9)-Tb(1)-O(5)    | 70.38(6)  |
| O(9)-Tb(1)-O(8)#1   | 78.40(7)  | O(9)-Tb(1)-O(4)    | 97.35(7)  |
| O(9)-Tb(1)-N(2)#1   | 124.83(7) | O(9)-Tb(1)-N(1)    | 73.45(7)  |

**Symmetry Codes:** #1 = 1+x, 3/2-y, 1/2+z

**Table S3** Distances (Å) and angles (°) of hydrogen bonds for the complex.

| Donor-H...acceptor | d(D-H)/Å | d(H...A)/Å | d(D...A)/Å | Angle/° |
|--------------------|----------|------------|------------|---------|
| O10-H10A...O12#1   | 0.85     | 1.92       | 2.724(3)   | 156.7   |
| O10-H10B...O11     | 0.85     | 1.89       | 2.740(3)   | 177.6   |
| O12-H12A...O7      | 0.85     | 1.84       | 2.689(3)   | 173.5   |
| O11-H11A...O7#2    | 0.85     | 2.04       | 2.891(3)   | 176.4   |
| O9-H9B...O3#3      | 0.85     | 1.89       | 2.732(3)   | 168.4   |
| O14-H14B...O2      | 0.85     | 1.65       | 2.482(4)   | 166.6   |

O14-H14C···O3#4

0.90(7)

1.74(7)

2.632(4)

177(6)

**Symmetry Codes:** #1 = 2-x, 2-y, 1-z; #2 = 2-x, -1/2+y, 3/2-z; #3 = 1-x, -1/2+y, 3/2-z;  
#4 = +x, -1+y, +z

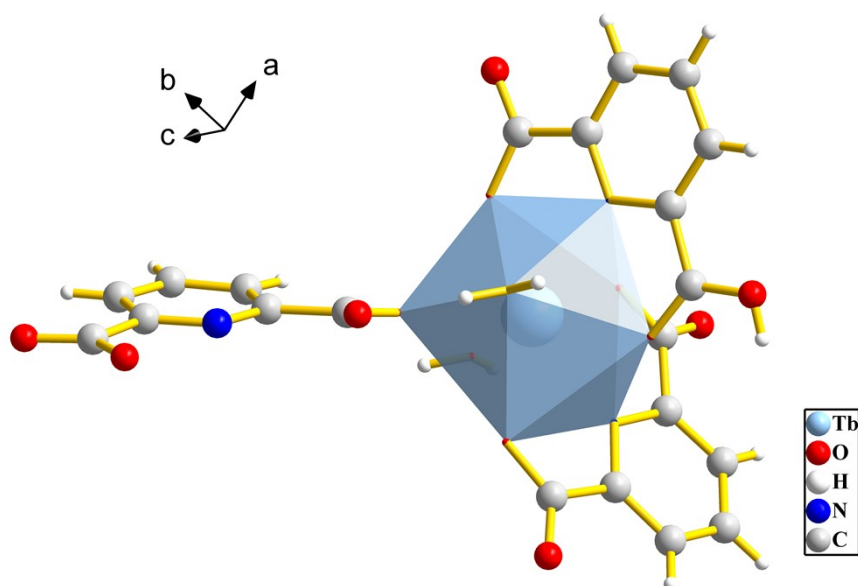

**Fig. S1.** The coordination environment of Tb<sup>III</sup> with surrounding oxygen atoms.

**Table S4.** The *CShM* values calculated by *SHAPE* 2.1<sup>3,4</sup> of Tb<sup>III</sup> ion in the complex.

| Coordination Geometry                    | Tb1    |
|------------------------------------------|--------|
| Johnson triangular cupola J3 (C3v)       | 14.613 |
| Capped cube J8 (C4v)                     | 9.172  |
| Spherical-relaxed capped cube (C4v)      | 7.618  |
| Capped square antiprism J10 (C4v)        | 1.907  |
| Spherical capped square antiprism (C4v)  | 1.107  |
| Tricapped trigonal prism J51 (D3h)       | 2.303  |
| Spherical tricapped trigonal prism (D3h) | 1.079  |
| Tridiminished icosahedron J63 (C3v)      | 11.044 |
| Hula-hoop (C2v)                          | 10.605 |
| Muffin (Cs)                              | 1.146  |

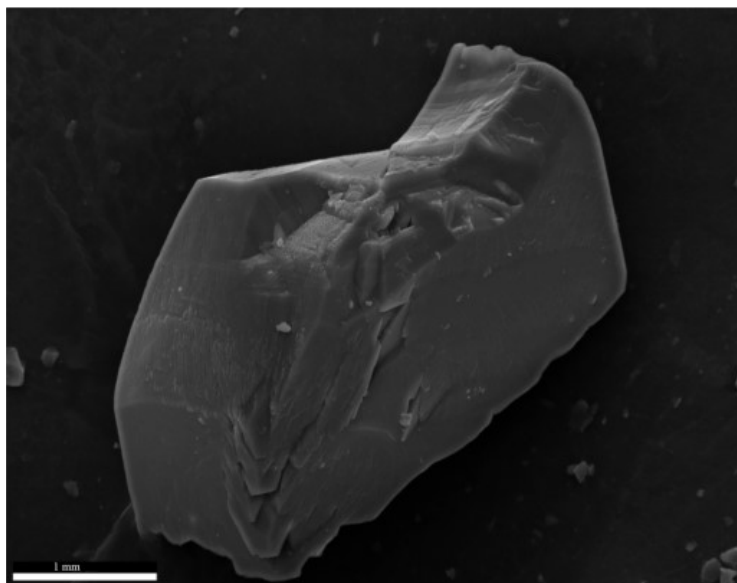

**Fig. S2.** Scanning electron microscope (SEM) photographs of the single crystal.

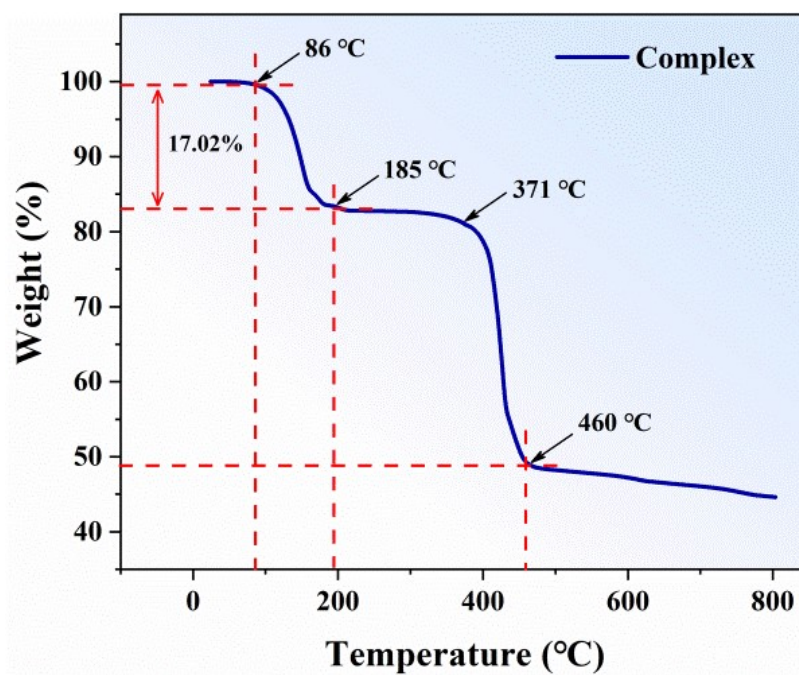

**Fig. S3.** The thermal gravimetric (TGA) curve of the complex.

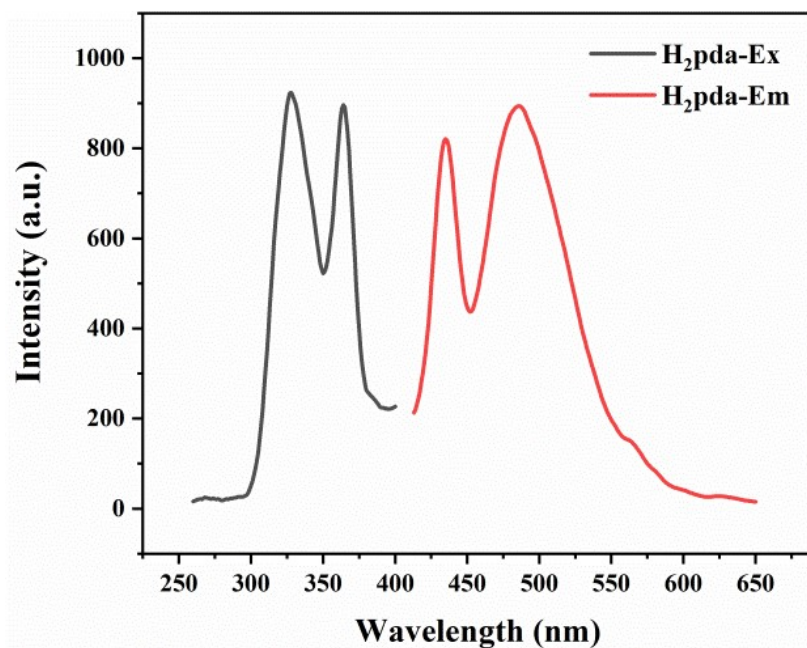

Fig. S4. Room-temperature excitation and emission spectra for H<sub>2</sub>pda ligand.

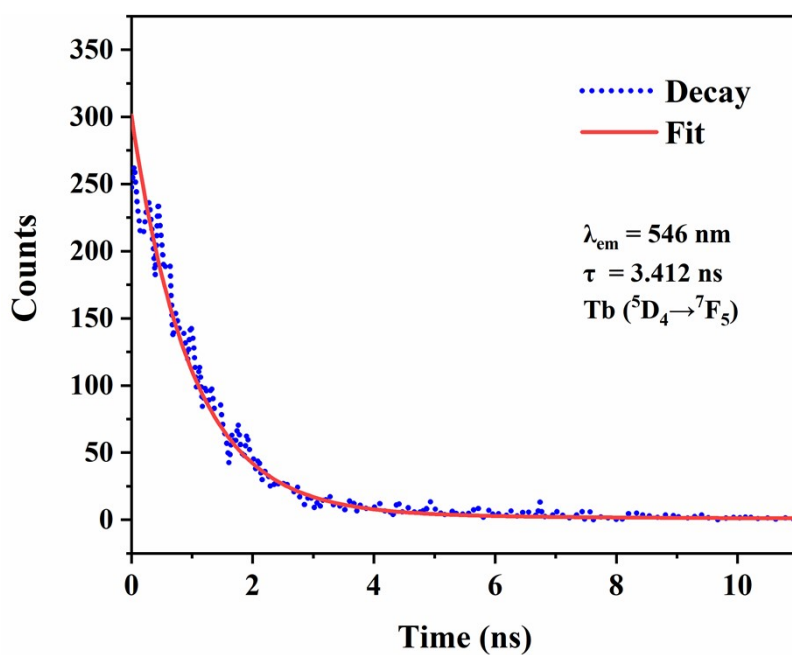

Fig. S5. The fluorescence decay and fit profiles of the complex ( $\lambda_{em} = 546 \text{ nm}$ ).

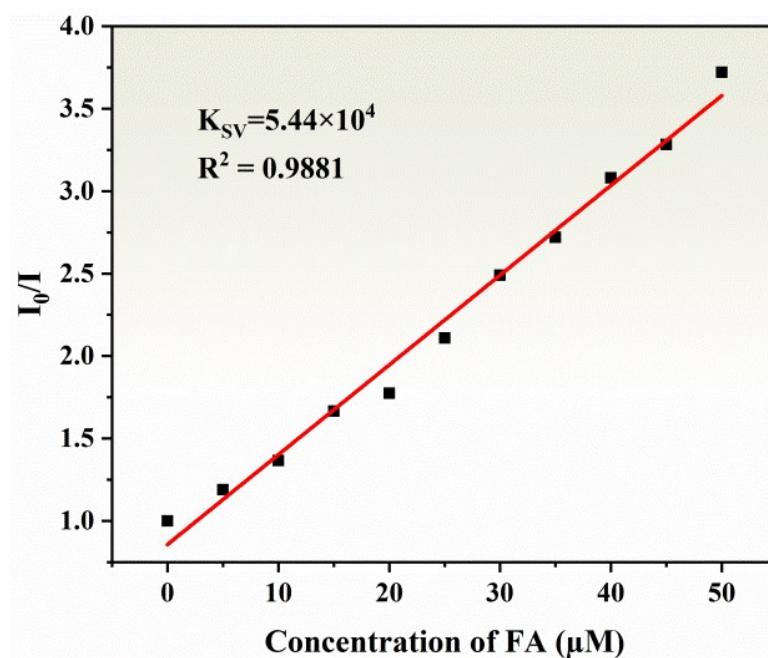

**Fig. S6.** Linear relationships between the fluorescence intensity ( $I/I_0$ ) and concentration of FA

**Table S5** Comparison of the present work with other reported sensors for FA detection

| Sensing materials                                                  | Linear range  | Detection limit | Reference        |
|--------------------------------------------------------------------|---------------|-----------------|------------------|
| CQDs                                                               | 1.14-47.57 μM | 0.38 μM         | 42               |
| OVA-CuNCs                                                          | 0.5-200 μM    | 0.18 μM         | 43               |
| Ag@Cu-MOFs                                                         | 0.5-73 μM     | 0.27 μM         | 44               |
| C <sub>60</sub> FNP                                                | 0-80 μM       | 0.24 μM         | 45               |
| Paper-based sensor                                                 | 1-300 μM      | 0.28 μM         | 46               |
| Bis-TPE-1                                                          | 0-100 μM      | 0.63 μM         | 47               |
| <b>[Tb(Hpda)(pda)(H<sub>2</sub>O)<sub>2</sub>]·4H<sub>2</sub>O</b> | 0-100 μM      | 0.22 μM         | <b>This work</b> |

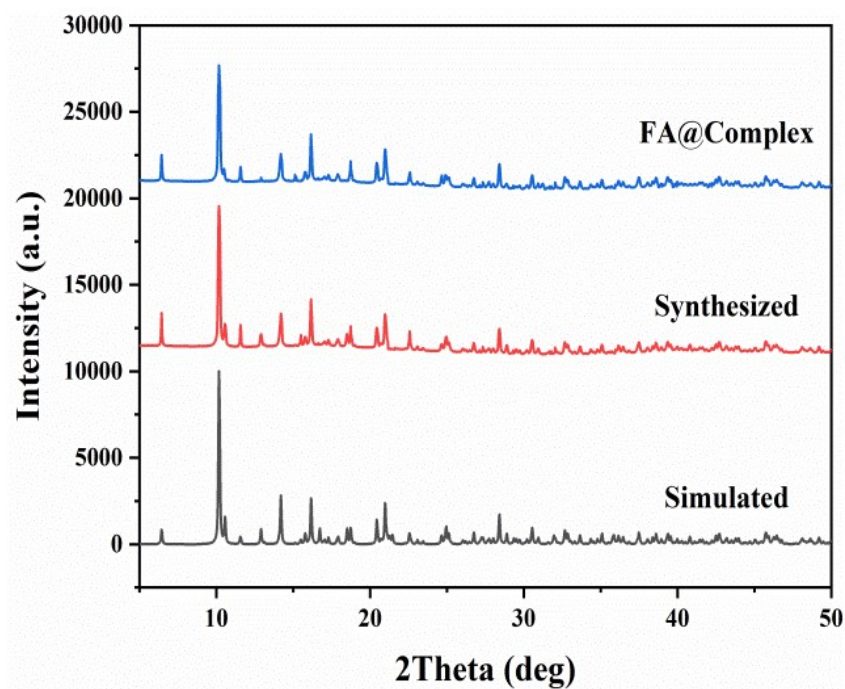

**Fig. S7.** The PXR D patterns of FA@Complex.

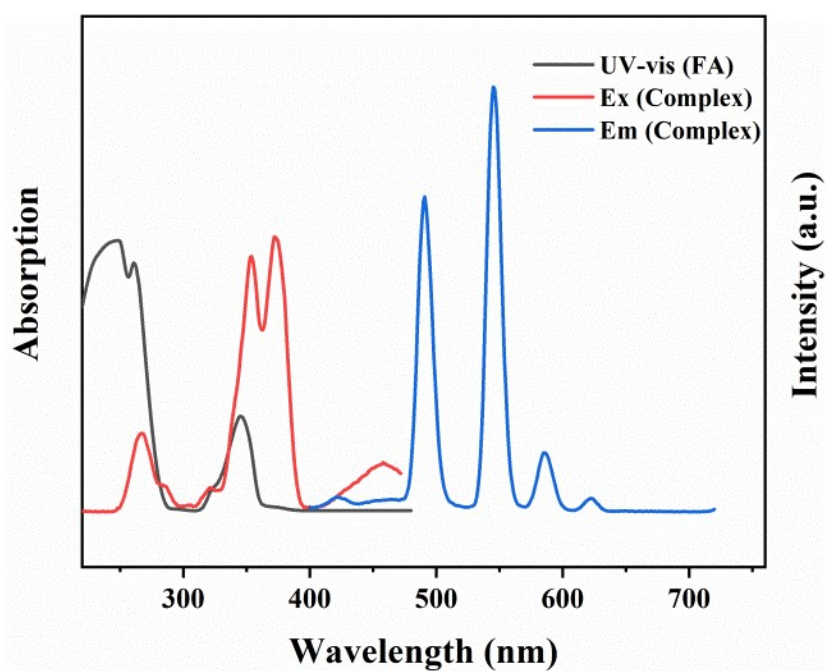

**Fig. S8.** The UV-Vis absorption spectra of FA and the fluorescence spectrum of the complex.
